# Supplementary material for: Nutritional Status in Nocturnal Hemodialysis Patients – A Systematic Review with Meta-Analysis
Source: PubMed Central journal article supplement (PMC4913934; doi:10.1371/journal.pone.0157621), 2016-06-20

S1 Figs.

S1a Fig.

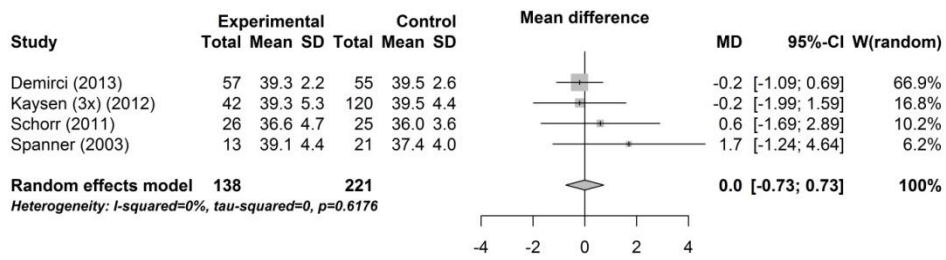

S1b Fig.

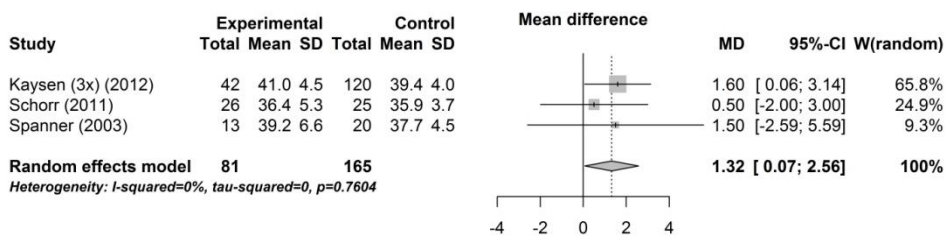

S1c Fig.

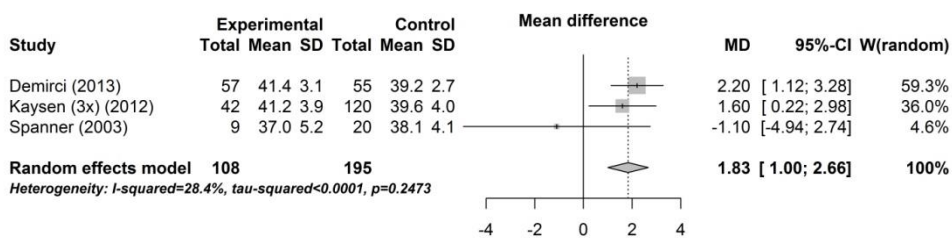

Supplement: pone.0157621.s001.pdf [file pone.0157621.s001.pdf]
